# Supplementary material
Source: publisher figshare collection journal article supplement (https://karger.figshare.com/ndownloader/files/8742295)
Supplement: Supplementary file 1 [file 8742295]

**Supplemental material**

Title: The effects of an internet-based imagery rehearsal intervention: A randomized controlled trial

Here: Description of the intervention usage, control groups tasks, and amount of personal contact across all groups.

|                                     | Condition                  |          |           |                              |          |           |                                             |          |           |                                             |          |           |
|-------------------------------------|----------------------------|----------|-----------|------------------------------|----------|-----------|---------------------------------------------|----------|-----------|---------------------------------------------|----------|-----------|
|                                     | Internet-based IRT         |          |           |                              |          |           | Control groups                              |          |           |                                             |          |           |
|                                     | Guided<br>( <i>n</i> = 34) |          |           | Unguided<br>( <i>n</i> = 30) |          |           | Frequency control<br>group ( <i>n</i> = 32) |          |           | Narrative control group<br>( <i>n</i> = 31) |          |           |
|                                     | <i>n</i>                   | <i>M</i> | <i>SD</i> | <i>n</i>                     | <i>M</i> | <i>SD</i> | <i>n</i>                                    | <i>M</i> | <i>SD</i> | <i>n</i>                                    | <i>M</i> | <i>SD</i> |
| Time spent on sessions              |                            |          |           |                              |          |           |                                             |          |           |                                             |          |           |
| Session 1: introduction (min)       | 25                         | 47.40    | 34.70     | 24                           | 47.08    | 23.50     |                                             |          |           |                                             |          |           |
| Session 2: imagination (min)        | 24                         | 42.71    | 16.42     | 24                           | 52.71    | 15.40     |                                             |          |           |                                             |          |           |
| Session 3: IRT (min)                | 22                         | 50.23    | 41.53     | 21                           | 37.14    | 14.02     |                                             |          |           |                                             |          |           |
| Session 4: IRT (min)                | 22                         | 52.96    | 38.25     | 21                           | 40.33    | 22.57     |                                             |          |           |                                             |          |           |
| Session 5: IRT (min)                | 22                         | 30.68    | 20.60     | 20                           | 23.25    | 13.21     |                                             |          |           |                                             |          |           |
| Session 6: Trouble shooting (min)   | 21                         | 22.62    | 25.28     | 18                           | 16.38    | 15.98     |                                             |          |           |                                             |          |           |
| Hours spent on treatment            | 25                         | 3.75     | 2.30      | 24                           | 3.32     | 1.37      |                                             |          |           |                                             |          |           |
| Weeks spent on treatment            | 25                         | 5.92     | 2.99      | 24                           | 5.57     | 2.27      |                                             |          |           |                                             |          |           |
| Number of sessions completed        | 25                         | 5.44     | 1.39      | 24                           | 5.33     | 1.27      |                                             |          |           |                                             |          |           |
| Nightmare diary                     |                            |          |           |                              |          |           |                                             |          |           |                                             |          |           |
| Number of weeks recorded            | 25                         | 5.44     | 1.39      | 24                           | 5.33     | 1.27      | 24                                          | 5.29     | 0.69      |                                             |          |           |
| Number of recorded nightmares       | 24                         | 8.16     | 4.45      | 23                           | 7.25     | 7.44      |                                             |          |           | 25                                          | 6.63     | 5.72      |
| Personal contact                    |                            |          |           |                              |          |           |                                             |          |           |                                             |          |           |
| SCID interview by phone (min)       | 25                         | 13.16    | 2.23      | 24                           | 13.00    | 3.19      | 24                                          | 13.96    | 2.16      | 27                                          | 12.48    | 4.42      |
| Technical support (frequency)       | 4                          |          |           | 4                            |          |           | 1                                           |          |           | 1                                           |          |           |
| Motivational support                |                            |          |           |                              |          |           |                                             |          |           |                                             |          |           |
| Number of motivational feedbacks    | 25                         | 4.20     | 1.58      | 3                            | 0.13     | 0.38      |                                             |          |           |                                             |          |           |
| Time spent (per patient)            | 25                         | 19.80    | 7.20      | 3                            | 0.67     | 2.16      |                                             |          |           |                                             |          |           |
| Content-related support             |                            |          |           |                              |          |           |                                             |          |           |                                             |          |           |
| Number of content-related feedbacks | 25                         | 1.48     | 1.12      | 4                            | 0.17     | 0.38      |                                             |          |           |                                             |          |           |

|                               |    |       |       |    |      |      |    |      |      |    |      |      |
|-------------------------------|----|-------|-------|----|------|------|----|------|------|----|------|------|
| Time spent (per patient)      | 25 | 15.08 | 15.91 | 4  | 2.08 | 5.70 |    |      |      |    |      |      |
| Reminder (number per patient) | 17 | 2.44  | 2.60  | 19 | 3.21 | 2.87 | 11 | 0.79 | 1.10 | 25 | 1.96 | 1.58 |

*Note.* *n*: Number of patients who completed a session, documented/recorded their nightmares, received technical support or reminders; *M*: Mean; *SD*: Standard deviation
